# Supplementary material
Source: ML conference proceedings conference paper supplement (https://openreview.net/forum?id=obiwUsWlki)
Supplement: supplementary_material [file attachment]

## 815 Appendix

### 816 A Reproducibility

817 All source codes, figures, models, etc., are available at [https://anonymous.4open.science/r/](https://anonymous.4open.science/r/debiasing_global_workspace-1063)  
818 `debiasing_global_workspace-1063`.

### 819 B Background

820 **Object-Centric Representation Learning.** Humans outperform sophisticated AI technologies due  
821 to our exceptional ability to recombine previously acquired knowledge, allowing us to extrapolate  
822 to novel scenarios [13, 17, 20]. Pursuing representations that generalize compositionally has been  
823 a significant research topic, with object-centric representation learning [6, 19, 43, 7, 30] emerging  
824 as a prominent effort. This approach represents each object in an image with a unique subset of the  
825 image’s latent code, enabling compositional generalization due to its modular structure.

826 Due to its simple yet effective design, Slot-Attention (SA) [43] has gained significant attention in  
827 unsupervised object-centric representation learning. Its iterative attention mechanism allows SA to  
828 learn and compete between slots for explaining parts of the input, showing a soft clustering effect on  
829 visual inputs [43]. Some recent works on implementing a cognitive architecture using object-centric  
830 methods have been proposed [27, 12]. Our approach also emphasizes compositional generalization in  
831 debiasing learning, using the slot-based method to implement a crucial module. The benefits of this  
832 method are noteworthy and deserve further exploration.

### 833 C Further Experimental Results and Details

834 In this section, we explain further experimental results and details. All experiments are conducted  
835 with three different random seeds and 95% confidence intervals.

#### 836 C.1 Hardware Specification of The Server

837 The hardware specification of the server that we used to experiment is as follows:

- 838 • CPU: Intel® Core™ i7-6950X CPU @ 3.00GHz (up to 3.50 GHz)
- 839 • RAM: 128 GB (DDR4 2400MHz)
- 840 • GPU: NVIDIA GeForce Titan Xp GP102 (Pascal architecture, 3840 CUDA Cores @ 1.6
- 841 GHz, 384-bit bus width, 12 GB GDDR G5X memory)

#### 842 C.2 Datasets

843 We describe the details of biased datasets, Colored MNIST (C-MNIST), Corrupted CIFAR-10  
844 (C-CIFAR-10), and BFFHQ.

845 **Colored MNIST.** Following existing studies [49, 33, 39, 4, 10, 38], this biased dataset comprises  
846 two highly correlated attributes: color and digit. We added specific colors to the foreground of each  
847 digit, generating bias-aligned and bias-conflicting samples for different ratios of bias-conflicting  
848 samples:

- 849 • 0.5%: (54751:249)
- 850 • 1%: (54509:491)
- 851 • 2%: (54014:986)
- 852 • 5%: (52551:2449)

853 **Corrupted CIFAR-10.** Among 15 different corruptions introduced in the original dataset [25], we  
854 selected types including Brightness, Contrast, Gaussian Noise, Frost, Elastic Transform, Gaussian  
855 Blur, Defocus Blur, Impulse Noise, Saturate, and Pixelate, related to CIFAR-10 classes [37]. We used

the most severe level of corruption for the dataset, with the following bias-aligned and bias-conflicting samples:

- 0.5%: (44832:228)
- 1%: (44527:442)
- 2%: (44145:887)
- 5%: (42820:2242)

**BFFHQ.** The dataset is created by using the Flickr-Faces-HQ (FFHQ) Dataset [31], focusing on age and gender as two strongly correlated attributes. The dataset includes 19200 training images (19104 bias-aligned and 96 bias-conflicting) and 1000 testing samples.

### C.3 Image Preprocessing

Following Lee et al. [38], our model is trained and evaluated using fixed-size images. For C-MNIST, the size is  $28 \times 28$ ; for C-CIFAR-10, it is  $32 \times 32$ , and for BFFHQ, it is  $224 \times 224$ . Images for C-CIFAR-10 and BFFHQ are preprocessed using random crop and horizontal flip transformations, as well as normalization along each channel (3, H, W) with a mean of (0.4914, 0.4822, 0.4465) and standard deviation of (0.2023, 0.1994, 0.2010). We do not use augmentation techniques for C-MNIST.

### C.4 Performance Evaluation

**Training Details.** For training, we use the Adam [35] optimizer with default parameters (i.e., betas = (0.9, 0.999) and weight decay = 0.0) provided in the PyTorch<sup>TM</sup> framework. We define two different learning rates:  $\text{LR}_{\text{DGW}}$  for our DGW modules, and LR for the remaining modules in our method, including encoders and classifiers. For C-MNIST, LR is 0.01, while  $\text{LR}_{\text{DGW}}$  is 0.0005 for C-MNIST-2%, 0.002 is for the remaining ratios of datasets. For C-CIFAR-10, LR is 0.001, and  $\text{LR}_{\text{DGW}}$  is 0.0001. For BFFHQ, LR is 0.0001 and 0.0002 is for  $\text{LR}_{\text{DGW}}$ .

We utilize StepLR for learning rate scheduling, with a decaying step set to 10K for all datasets. The decay ratio is 0.5 for both C-MNIST and C-CIFAR-10 and 0.1 for BFFHQ. Following [38], we adjust the learning rate after performing feature augmentation.

We set the hyperparameters ( $\lambda_{\text{re}}, \lambda_{\text{swap}_b}, \lambda_{\text{swap}_c}, \lambda_{\text{ent}}$ ) for our proposed loss functions (Section 3.3 in the main text). (10, 10, 1, 0.01) is set for the ratio of 0.5% of C-MNIST, and (15, 15, 1, 0.01) for the ratio of 1%, 2%, and 5% of C-MNIST. We set (1, 1, 1, 0.01) for C-CIFAR-10, and (2, 2, 0.1, 0.01) for BFFHQ.

Our proposed mixup strategy uses the hyperparameter  $\beta$  to select the mixing coefficient  $\alpha \sim \text{Beta}(\beta, \beta)$ . For BFFHQ, we set 0.5, whereas 0.2 for C-MNIST and C-CIFAR-10.

We provide the scripts, including all hyperparameter setups, in our Git repository (Section A) to reproduce our performance evaluation.

### C.5 Analysis for Interpretable Attribute Representation

**Initialization of Concept Slots.** The initialization of concept slots is crucial for our model’s performance, tailoring the attention mechanisms to each dataset. We set the initial number of concept slots ( $C$ ) as follows:

- For C-MNIST,  $C$  is set to 2, reflecting its simple attribute composition
- For C-CIFAR-10,  $C$  is set to 10, accommodating its diverse features
- For BFFHQ,  $C$  is set to 10, capturing a wide range of human facial features

**Additional Visualization on C-MNIST dataset.** Figure A-1 displays the attention masks  $\mathbf{A}^i = \mathbf{A}(\mathbf{S}_{\text{latent}}^i, \mathbf{E}^i)$  generated by eq. 3 in the main text for C-MNIST, showing the model focuses on digit shapes, ignoring color. Fig. A-2 shows the attention masks  $\mathbf{A}^b = \mathbf{A}(\mathbf{S}_{\text{latent}}^b, \mathbf{E}^b)$  generated by eq. 3 in the main text, highlighting how the model responds to color patterns. Similar colors, like the purple digits 2, 3, 0, and 6, have similar attention masks, indicating the model’s sensitivity to color.

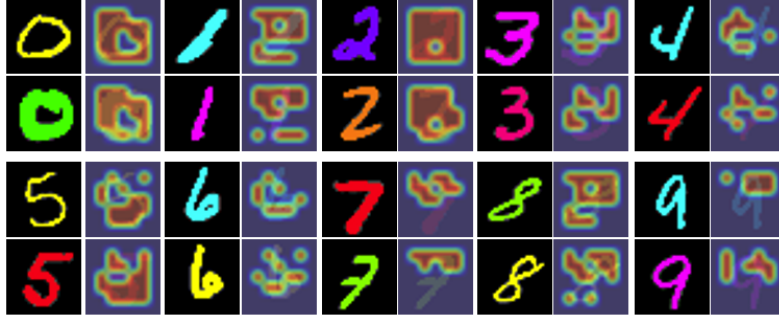

Figure A-1: Visualization of attention masks  $A^i$  for the C-MNIST dataset

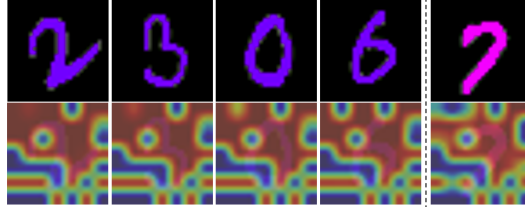

Figure A-2: Visualization from the C-MNIST dataset showing attention masks  $A^b$ , highlighting color patterns. Digits in similar colors (e.g., 2, 3, 0, and 6) share similar attention mask patterns.

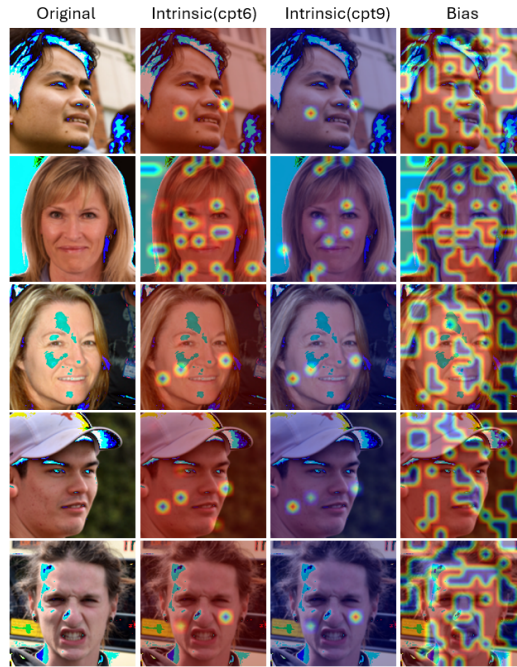

Figure A-3: Face images with attention masks. The first column shows the original image, the next two columns show attention masks  $A^i$  from concept slots 6 and 9, and the last column shows masks  $A^b$ .

902 **Visualization on BFFHQ dataset.** Figure A-3 shows DGW's behavior on the BFFHQ dataset,  
 903 where the intrinsic components display complementary behavior within themselves (concept slots  
 904 6 and 9), focusing on specific facial features like cheeks for gender classification. This behavior is  
 905 due to BFFHQ's focus on human facial shapes for gender classification, where the model prioritizes  
 906 critical facial features, filtering out less relevant data.

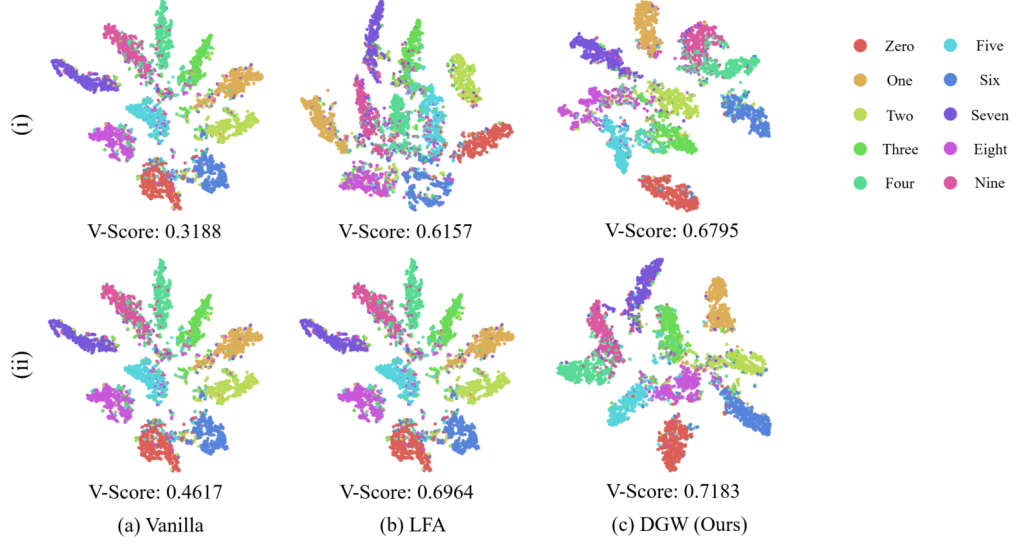

Figure A-4: t-SNE plots for intrinsic features on C-MNIST (with (i) 1.0% and (ii) 2.0% settings).

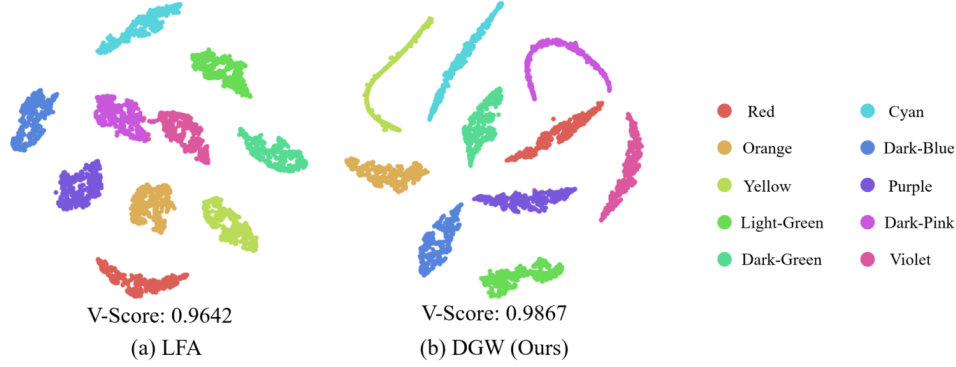

Figure A-5: t-SNE plots for bias features on C-MNIST (with 0.5% setting).

## C.6 Quantitative and Qualitative Analysis

**t-SNE and Clustering.** We provide more results with t-SNE plots and clustering scores with V-Score [53] as illustrated in Fig. A-4 and A-5. V-Score, a harmonic mean between homogeneity and completeness, is widely used to evaluate clustering. A higher V-Score indicates tighter intra-class clusters and better inter-class separation.

In Fig. A-4, intrinsic features from baselines and the intrinsic attribute encoder  $\phi^i$  are used. It consistently shows a higher V-Score, implying better classification and intrinsic attribute capture compared to baselines. V-Scores are higher in setting (ii) than (i) because more bias-conflicting samples are used for training in setting (ii).

In Fig. A-5, features from the bias attribute capturing layer of LFA and the bias attribute encoder  $\phi^b$  are utilized. It shows a higher V-Score compared to LFA, indicating more effective bias attribute separation. Overall, our method outperforms baselines, demonstrating robust separation of intrinsic and bias attributes to improve debiasing process.

**Model Similarity.** We use Centered Kernel Alignment (CKA) [51, 36, 9] to visualize similarities between all pairs of layers in different models, helping us understand model behavior. The bias and intrinsic attribute encoders  $\phi^b$  and  $\phi^i$  in our approach are compared.

In Fig. A-6 and Fig. A-7, Vanilla and LFA models show similar weights in many layers, represented by bright colors. In contrast, our method shows significantly lower similarity values, indicating



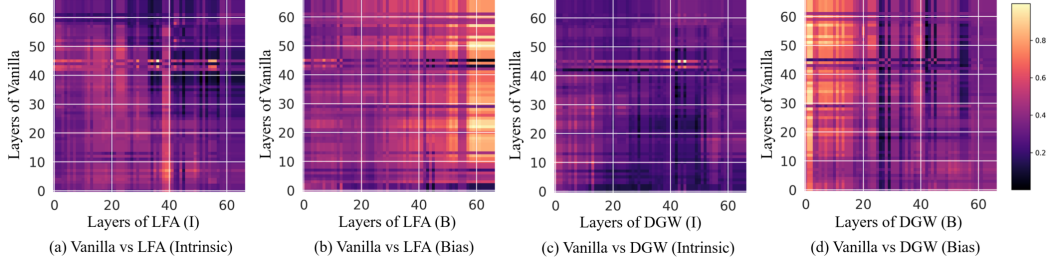

Figure A-6: Representations of similarities for vanilla model and different methods with all pairs of layers on C-CIFAR-10 (5.0% setting). A high similarity score denotes high values.

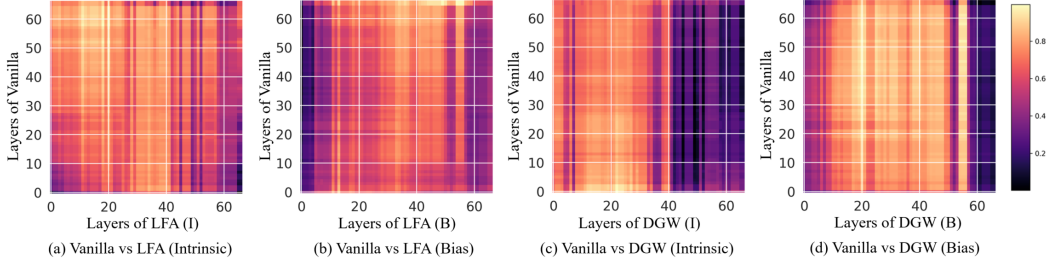

Figure A-7: Representations of similarities for vanilla model and different methods with all pairs of layers on BFFHQ (0.5% setting). A high similarity score denotes high values.

Table A-1: ECE (%) and NLL under different settings on C-MNIST and C-CIFAR-10.

| Dataset   | C-MNIST     |              |             |             |             |             |             |             | C-CIFAR-10   |             |              |             |             |             |             |             |
|-----------|-------------|--------------|-------------|-------------|-------------|-------------|-------------|-------------|--------------|-------------|--------------|-------------|-------------|-------------|-------------|-------------|
|           | 0.5         |              | 1.0         |             | 2.0         |             | 5.0         |             | 0.5          |             | 1.0          |             | 2.0         |             | 5.0         |             |
| Ratio (%) | ECE         | NLL          | ECE         | NLL         | ECE         | NLL         | ECE         | NLL         | ECE          | NLL         | ECE          | NLL         | ECE         | NLL         | ECE         | NLL         |
| Vanilla   | 10.9        | <b>13.17</b> | 7.97        | <b>6.45</b> | 5.70        | <b>5.71</b> | 9.54        | 4.10        | 13.75        | 5.99        | 13.14        | 9.87        | 12.25       | 6.65        | 13.76       | 5.99        |
| LFA       | 4.35        | 67.72        | 2.79        | 36.46       | 2.09        | 18.35       | 7.59        | <b>3.09</b> | 12.09        | 5.81        | <b>11.45</b> | 7.27        | 10.25       | 5.14        | 7.56        | 3.09        |
| DGW       | <b>3.41</b> | 271.71       | <b>2.03</b> | 143.36      | <b>1.73</b> | 41.44       | <b>1.61</b> | 20.19       | <b>11.85</b> | <b>5.71</b> | 11.53        | <b>6.88</b> | <b>9.96</b> | <b>4.41</b> | <b>7.55</b> | <b>3.01</b> |

different weights and behaviors across layers compared to Vanilla and LFA. Our method affects deeper layers more, where the attention module is inserted, suggesting a distinct impact on model behavior.

**Model Reliability.** To evaluate the generalizability of models, we measure Expected Calibration Error (ECE) and Negative Log Likelihood (NLL) [21], where ECE is to measure calibration error and NLL is to calculate the probabilistic quality of a model. In detail, ECE aims to evaluate whether the predictions of a model are reliable and accurate, which is a simple yet sufficient metric for assessing model calibration and reflecting model generalizability [21].

In Table A-1, our method consistently shows the lowest ECE, indicating better calibration and reliability. For C-MNIST, it presents a higher NLL compared to baselines. Since C-MNIST includes color bias only in the training set, it prevents overfitting by being less affected by bias, leading to better overall model performance. This trend is consistent across different settings in C-MNIST, providing insights into analyzing and explaining dataset bias types and complexity characteristics.
